# Supplementary material for: Routine health information use among healthcare providers in Ethiopia: a systematic review and meta-analysis
Source: HighWire-hosted journal article supplement (doi:10.1136/bmjhci-2022-100693), 2023-03-01
Supplement: bmjhci-2022-100693supp001_data_supplement.pdf [file bmjhci-2022-100693supp001_data_supplement.pdf]

1. Was the article published in any time prior to August 2022?
2. Was the article written in English?
3. Was the population studied healthcare providers in Ethiopia?
4. Did the study look at routine health information use in the review question?
5. Had the study design been reported? Was it relevant to the review question?
6. Was an outcome measured?
7. Did the article have full text and abstract
8. Was it article or editorial reports, or letters, or reviews, or commentaries?
